# Supplementary material
Source: publisher site journal article supplement (https://www.dovepress.com/article/253638)
Supplement: Supplementary file 1 [file get_supplementary_file.php]

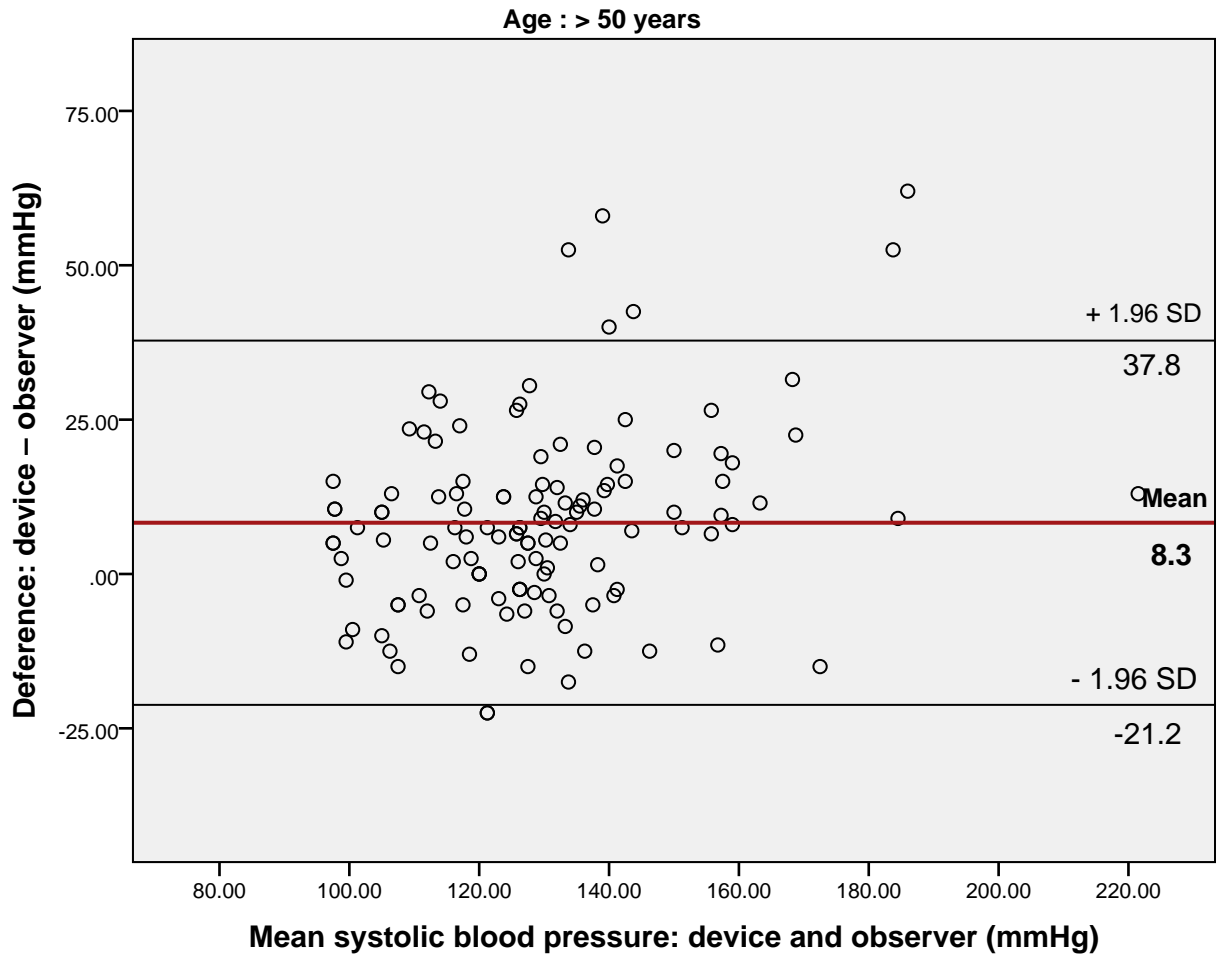

Supplementary file 1  
Bland-Altman plots of mean observer and device systolic blood pressure versus the device minus the observer readings in age over 50 years

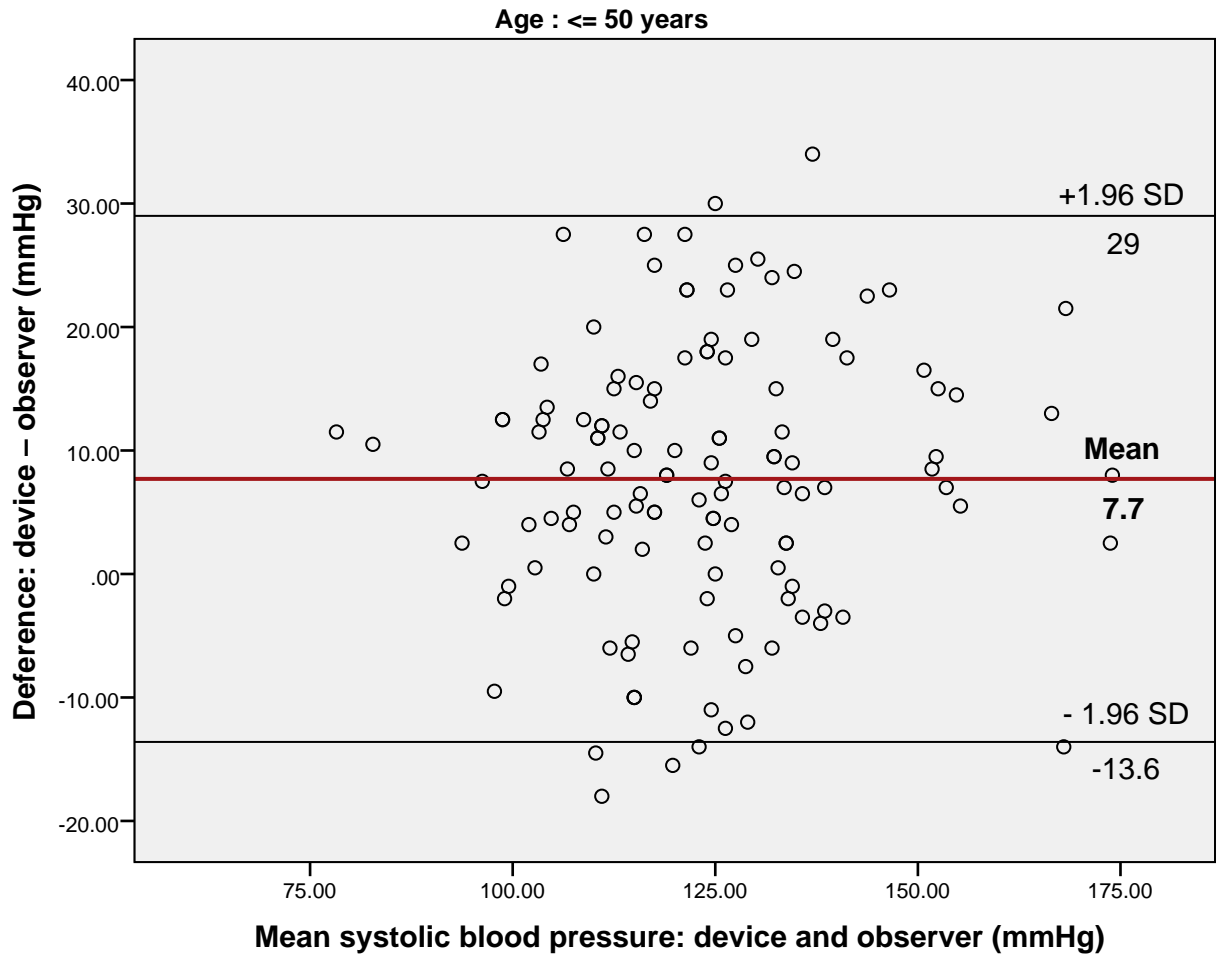

Supplementary file 2  
Bland-Altman plots of mean observer and device systolic blood pressure versus the device minus the observer readings in age less than 50 years

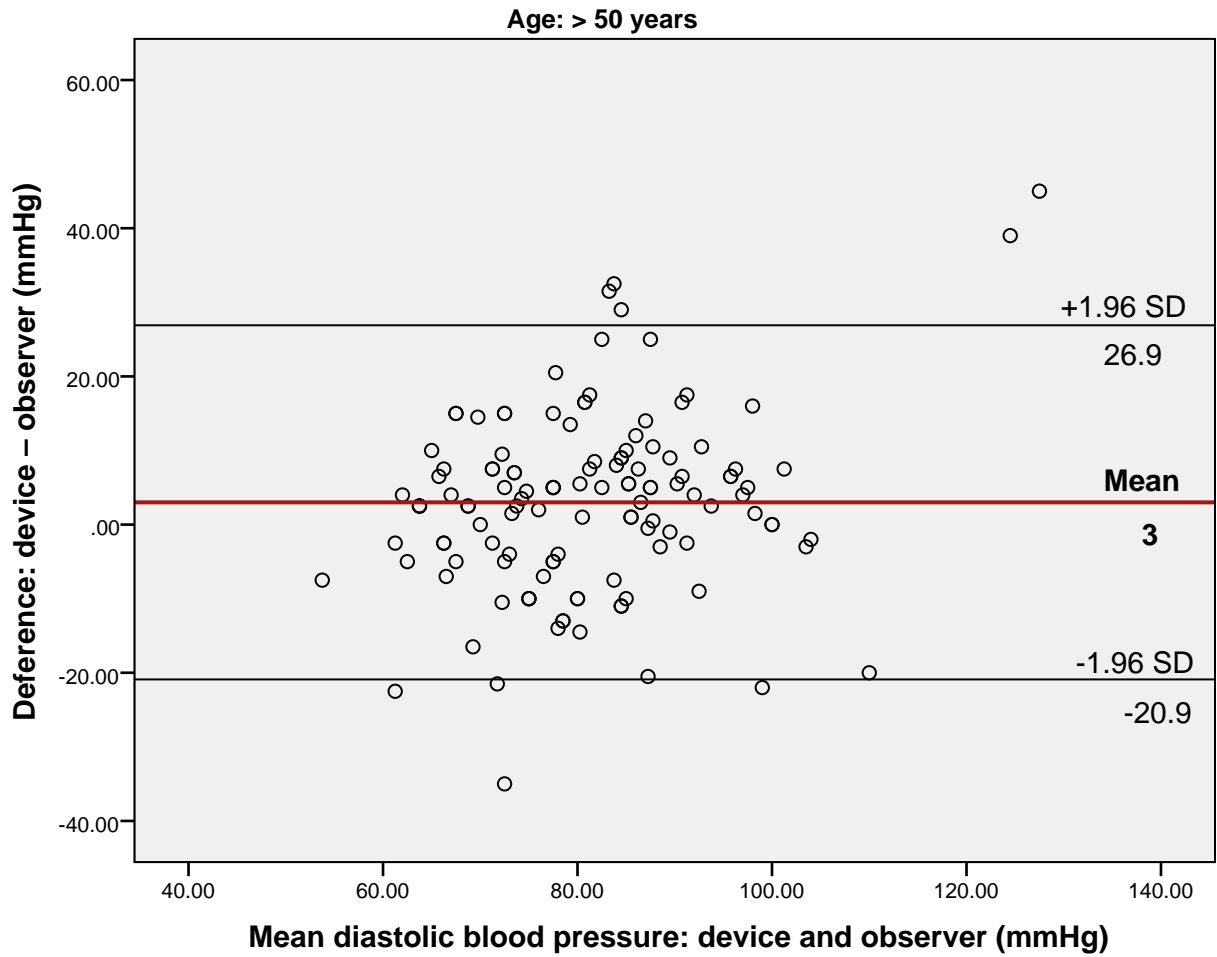

Supplementary file 3  
Bland-Altman plots of mean observer and device diastolic blood pressure versus the device minus the observer readings in age over 50 years

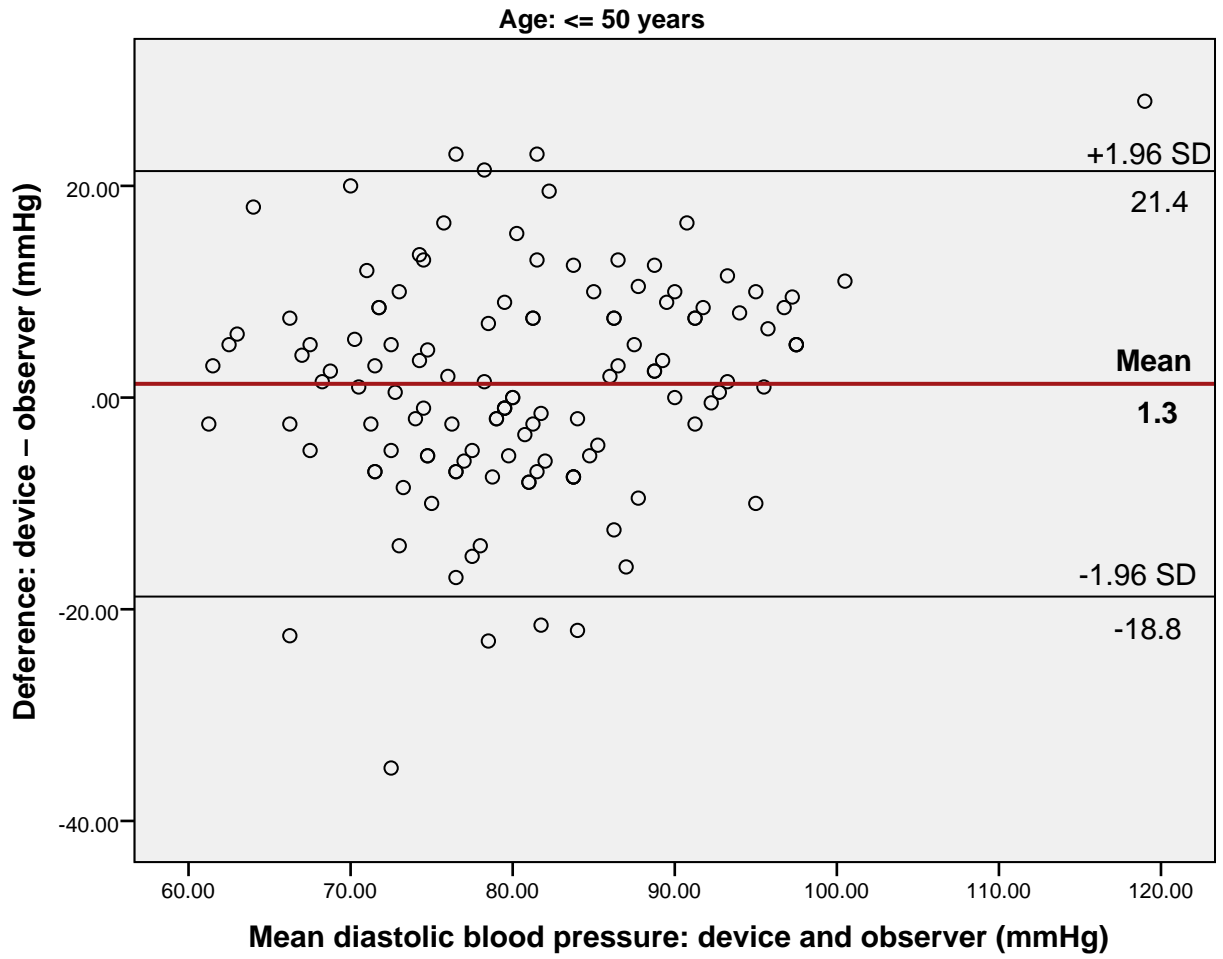

Supplementary file 4  
Bland–Altman plots of mean observer and device diastolic blood pressure versus the device minus the observer readings in age less than 50 years

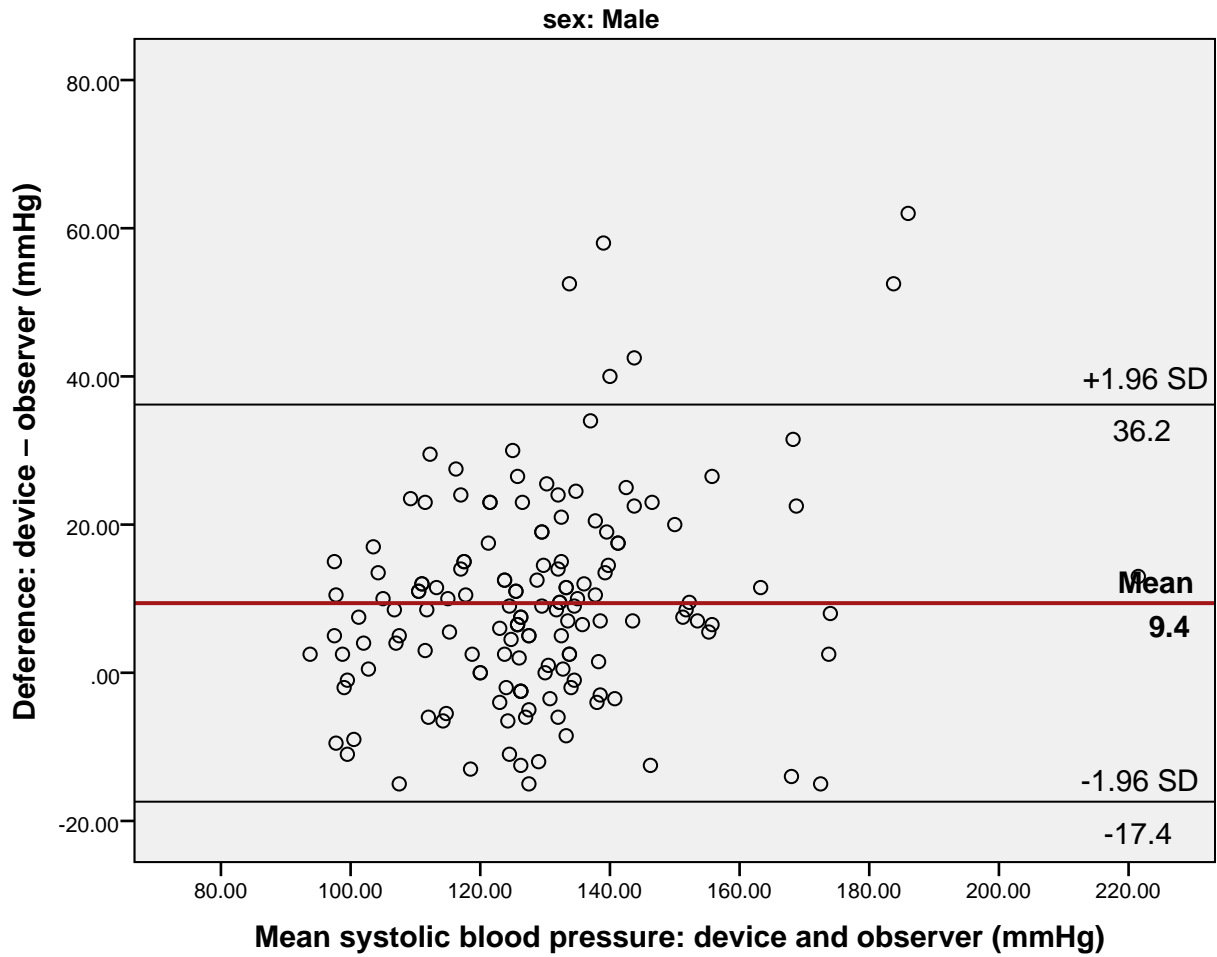

Supplementary file 5  
Bland–Altman plots of mean observer and device systolic blood pressure versus the device minus the observer readings in male gender

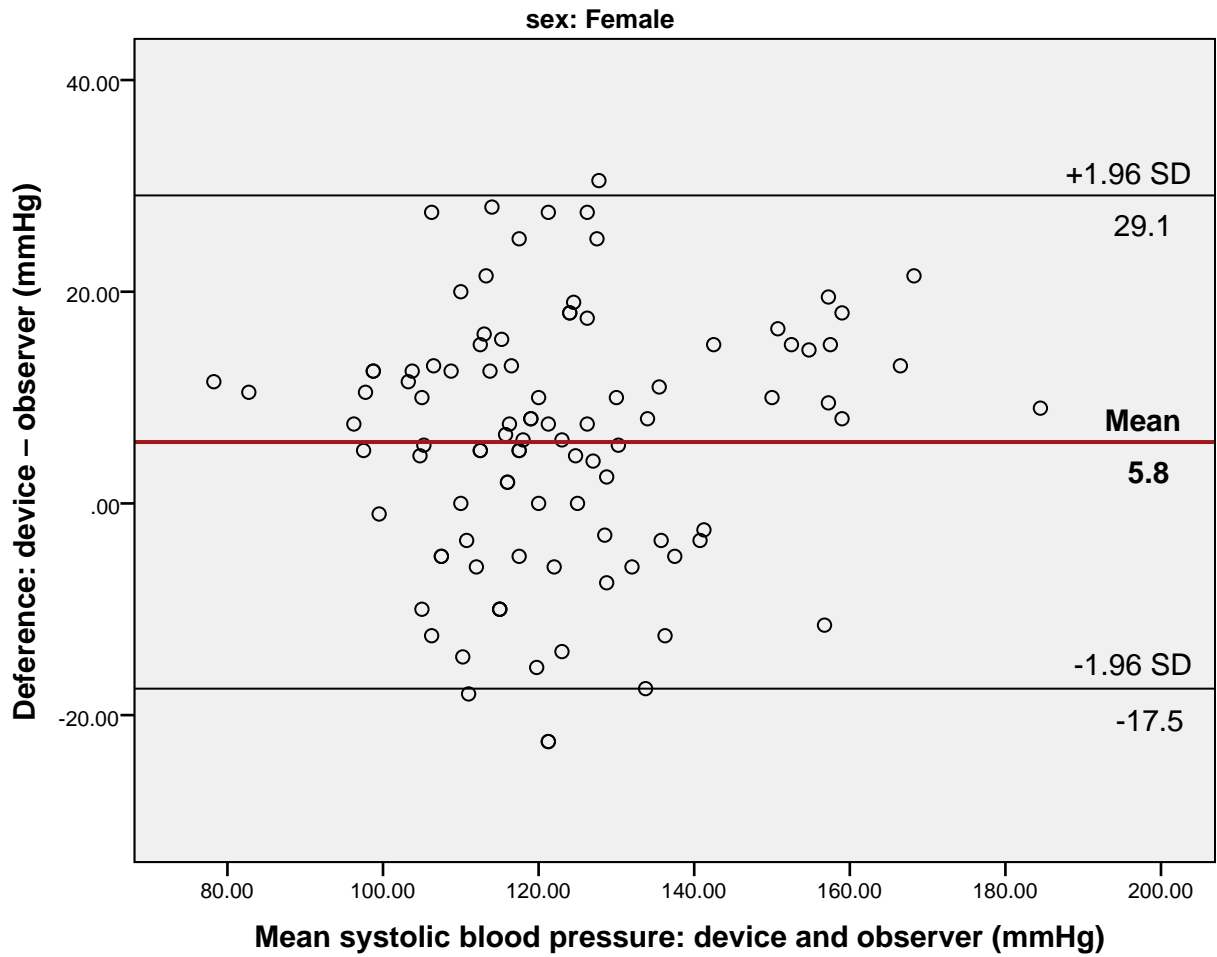

Supplementary file 6  
Bland-Altman plots of mean observer and device systolic blood pressure versus the device minus the observer readings in female gender

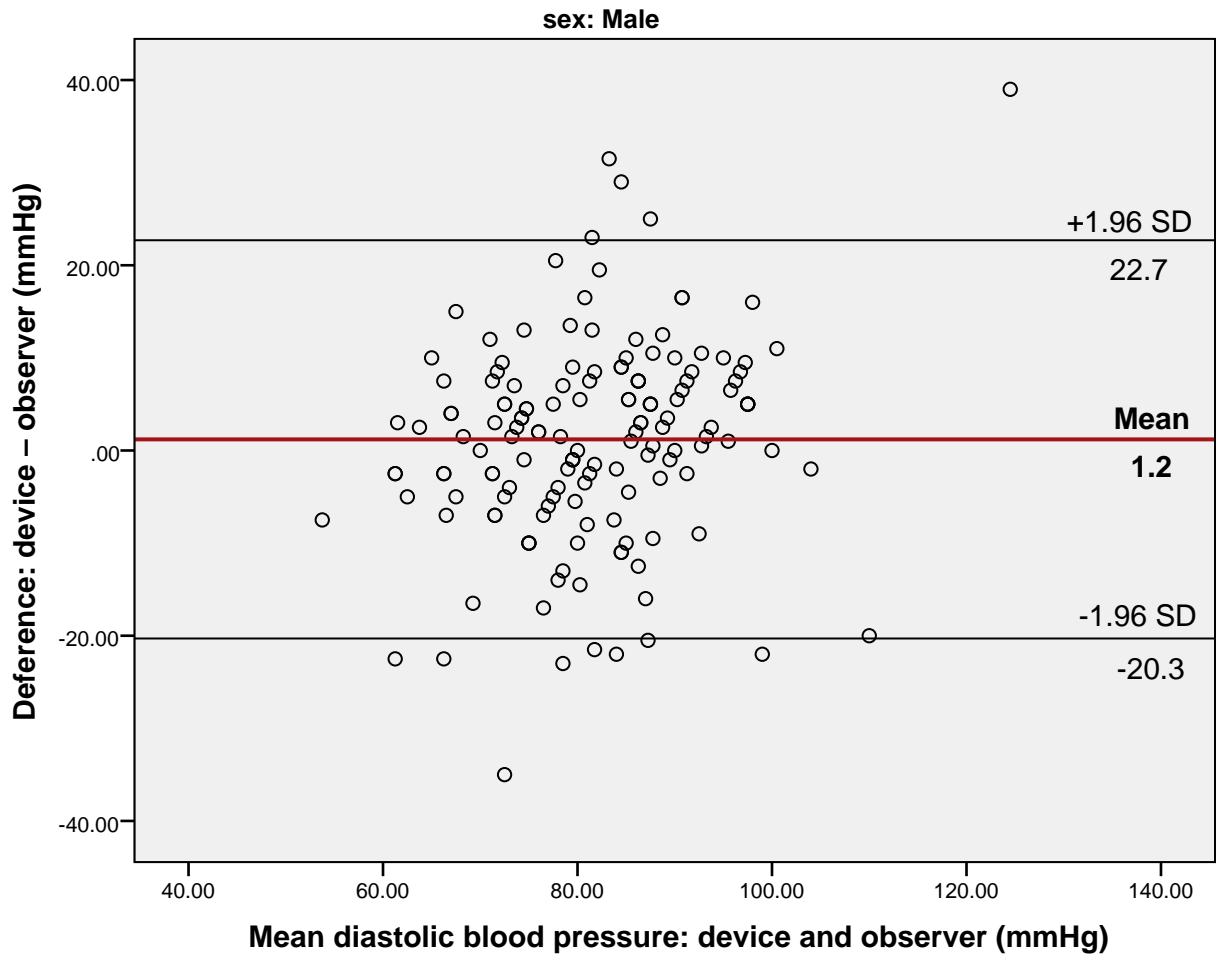

Supplementary file 7  
Bland-Altman plots of mean observer and device diastolic blood pressure versus the device minus the observer readings in male gender

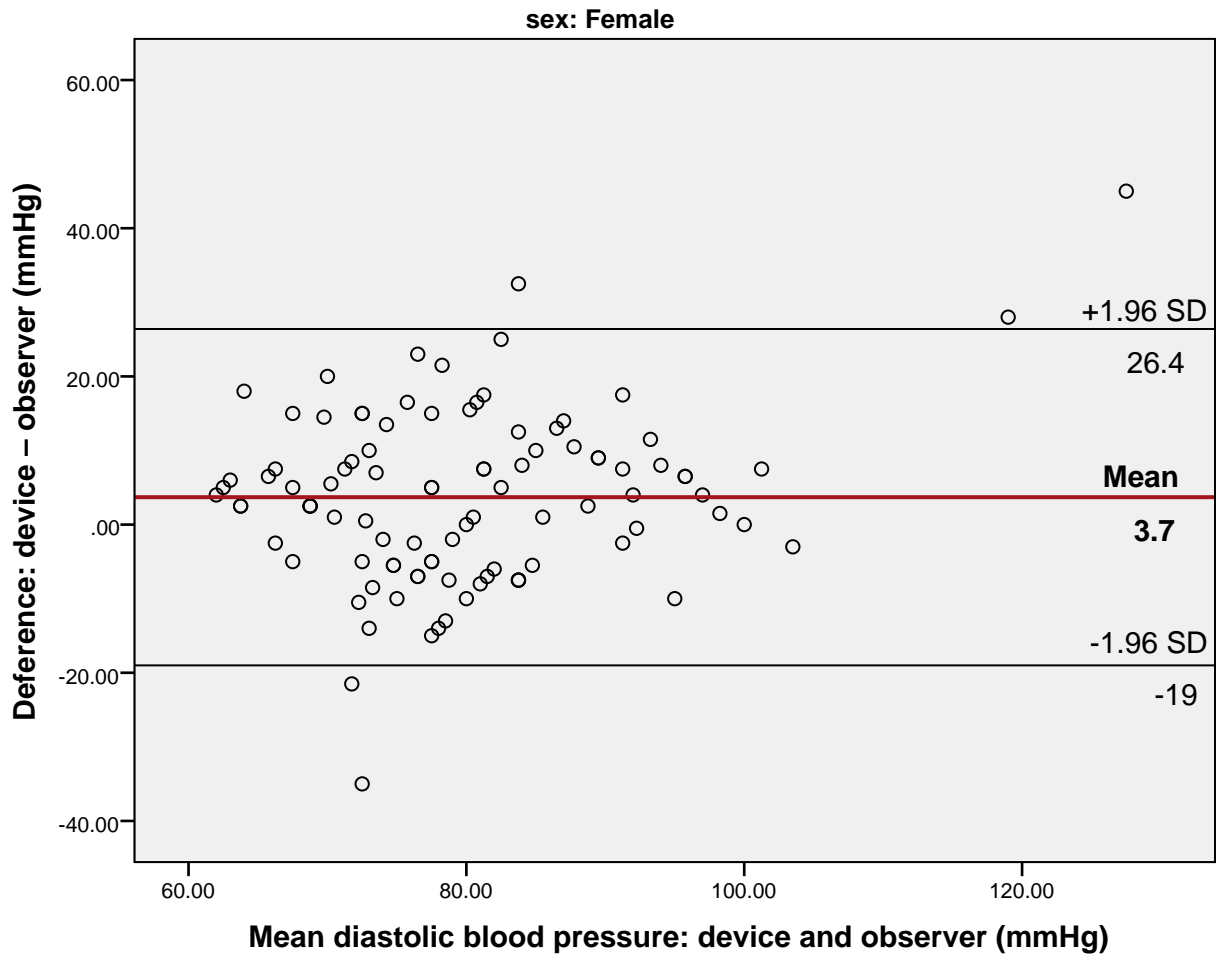

Supplementary file 8  
 Bland–Altman plots of mean observer and device diastolic blood pressure versus the device minus the observer readings in female gender
